# Supplementary material for: Geometries, stabilities, and electronic properties of Pt-group-doped gold clusters, their relationship to cluster size, and comparison with pure gold clusters
Source: Royal Society of Chemistry journal article supplement (doi:10.1039/c0cp02506b), 2011-01-01
Supplement: c0cp02506b.pdf [file c0cp02506b.pdf]

File 1. The xyz-coordinates for Au<sub>n</sub>(n=3-8)

| Au <sub>n</sub> (n=3-8) xyz-Coordinates (Å) |          |           |           |        |           |           |           |        |           |           |          |
|---------------------------------------------|----------|-----------|-----------|--------|-----------|-----------|-----------|--------|-----------|-----------|----------|
| symbol                                      | x        | y         | z         | symbol | x         | y         | z         | symbol | x         | y         | z        |
| 1Au                                         | 0.000000 | 2.486815  | -0.295798 | 1Au    | 2.701672  | 1.559811  | 0.000000  | 1Au    | 0.000000  | 2.029930  | 0.000000 |
| 2Au                                         | 0.000000 | -2.486815 | -0.295798 | 2Au    | 0.000000  | 1.675263  | 0.000000  | 2Au    | 2.029930  | 0.000000  | 0.000000 |
| 3Au                                         | 0.000000 | 0.000000  | 0.591597  | 3Au    | 1.450820  | -0.837631 | 0.000000  | 3Au    | 0.000000  | -2.029930 | 0.000000 |
|                                             |          |           |           | 4Au    | -2.701672 | 1.559811  | 0.000000  | 4Au    | -2.029930 | 0.000000  | 0.000000 |
| 1Au                                         | 0.000000 | 1.339303  | 0.000000  | 5Au    | -1.450820 | -0.837631 | 0.000000  | 5Au    | -2.629397 | 2.629397  | 0.000000 |
| 2Au                                         | 0.000000 | 0.000000  | 2.424185  | 6Au    | 0.000000  | -3.119622 | 0.000000  | 6Au    | -2.629397 | -2.629397 | 0.000000 |
| 3Au                                         | 0.000000 | 0.000000  | -2.424185 |        |           |           |           | 7Au    | 2.629397  | 2.629397  | 0.000000 |
| 4Au                                         | 0.000000 | -1.339303 | 0.000000  | 1Au    | 0.965598  | -1.716463 | 0.000019  | 8Au    | 2.629397  | -2.629397 | 0.000000 |
|                                             |          |           |           | 2Au    | -1.029214 | 0.659154  | 0.000026  |        |           |           |          |
| 1Au                                         | 0.000000 | 2.696540  | 0.948870  | 3Au    | -3.687530 | -0.068564 | 0.000002  |        |           |           |          |
| 2Au                                         | 0.000000 | -1.388560 | -1.470507 | 4Au    | 1.792025  | 1.029530  | -0.000018 |        |           |           |          |
| 3Au                                         | 0.000000 | -2.696540 | 0.948870  | 5Au    | 3.593771  | -0.998878 | 0.000001  |        |           |           |          |
| 4Au                                         | 0.000000 | 0.000000  | 1.043274  | 6Au    | 0.098706  | 3.125549  | -0.000005 |        |           |           |          |
| 5Au                                         | 0.000000 | 1.388560  | -1.470507 | 7Au    | -1.733355 | -2.030328 | -0.000025 |        |           |           |          |

File 2. The xyz-coordinates for  $Au_nM_2$  ( $n=1\sim6$ ,  $M=Ni, Pd,$  and  $Pt$ ) clusters.

| Is | symbol | $Au_nNi_2(n=1-6)$ Coordinates (Å) |           |           | symbol | $Au_nPd_2(n=1-6)$ Coordinates (Å) |           |           | symbol | $Au_nPt_2(n=1-6)$ Coordinates (Å) |           |           |
|----|--------|-----------------------------------|-----------|-----------|--------|-----------------------------------|-----------|-----------|--------|-----------------------------------|-----------|-----------|
|    |        | x                                 | y         | z         |        | x                                 | y         | z         |        | x                                 | y         | z         |
| 3a | 1Au    | 0.000000                          | 0.000000  | 0.000000  | 1Au    | 0.000000                          | 0.000000  | 1.260859  | 1Au    | 0.000000                          | 0.000000  | 0.000000  |
|    | 2Ni    | 0.000000                          | 0.000000  | 2.556590  | 2Pd    | 0.000000                          | 1.285671  | -1.082694 | 2Pt    | 0.000000                          | 0.000000  | 2.590713  |
|    | 3Ni    | 0.000000                          | 0.000000  | -2.556590 | 3Pd    | 0.000000                          | -1.285671 | -1.082694 | 3Pt    | 0.000000                          | 0.000000  | -2.590713 |
| 3b | 1Au    | 0.000000                          | 0.000000  | 0.958962  | 1Pd    | 0.000000                          | 0.000000  | 2.619942  | 1Pt    | 0.000000                          | 1.272389  | -0.787826 |
|    | 2Ni    | 0.000000                          | 1.166559  | -1.352822 | 2Pd    | 0.000000                          | 0.000000  | -2.619942 | 2Pt    | 0.000000                          | -1.272389 | -0.787826 |
|    | 3Ni    | 0.000000                          | -1.166559 | -1.352822 | 3Au    | 0.000000                          | 0.000000  | 0.000000  | 3Au    | 0.000000                          | 0.000000  | 1.555706  |
| 4a | 1Ni    | 0.000000                          | 1.199915  | 0.000000  | 1Pd    | 0.000000                          | 1.417790  | 1.149037  | 1Au    | -2.871332                         | -0.014993 | -0.000595 |
|    | 2Ni    | 0.000000                          | -1.199915 | 0.000000  | 2Pd    | 0.000000                          | -1.417790 | 1.149037  | 2Au    | 2.446206                          | -0.617079 | -0.000618 |
|    | 3Au    | 0.000000                          | 0.000000  | 2.281693  | 3Au    | -1.447767                         | 0.000000  | -0.669060 | 3Pt    | -0.415592                         | -0.747808 | 0.000983  |
|    | 4Au    | 0.000000                          | 0.000000  | -2.281693 | 4Au    | 1.447767                          | 0.000000  | -0.669060 | 4Pt    | 0.846169                          | 1.387983  | 0.000245  |
| 4b | 1Ni    | 0.000000                          | 1.478433  | 0.000000  | 1Pd    | 0.000000                          | 1.424877  | 0.448872  | 1Au    | 0.000000                          | 1.717015  | -0.793717 |
|    | 2Ni    | 0.000000                          | -1.478433 | 0.000000  | 2Pd    | 0.000000                          | -1.424877 | 0.448872  | 2Au    | 0.000000                          | -1.717015 | -0.793717 |
|    | 3Au    | 0.000000                          | 0.000000  | 2.067357  | 3Au    | -2.154073                         | 0.000000  | -0.261368 | 3Pt    | -1.338917                         | 0.000000  | 0.803892  |
|    | 4Au    | 0.000000                          | 0.000000  | -2.067357 | 4Au    | 2.154073                          | 0.000000  | -0.261368 | 4Pt    | 1.338917                          | 0.000000  | 0.803892  |
| 4c | 1Au    | 0.000000                          | 2.007199  | -0.235093 | 1Au    | 0.000000                          | 1.457389  | 0.000000  | 1Pt    | 0.000000                          | 1.355752  | 0.516448  |
|    | 2Au    | 0.000000                          | -2.007199 | -0.235093 | 2Au    | 0.000000                          | -1.457389 | 0.000000  | 2Pt    | 0.000000                          | -1.355752 | 0.516448  |
|    | 3Ni    | 1.231569                          | 0.000000  | 0.663299  | 3Pd    | 0.000000                          | 0.000000  | 2.260361  | 3Au    | 2.058693                          | 0.000000  | -0.509910 |
|    | 4Ni    | -1.231569                         | 0.000000  | 0.663299  | 4Pd    | 0.000000                          | 0.000000  | -2.260361 | 4Au    | -2.058693                         | 0.000000  | -0.509910 |
| 5a | 1Au    | 0.000000                          | 1.596821  | -1.362326 | 1Au    | 0.000000                          | 0.000000  | 1.468098  | 1Pt    | 0.000000                          | 1.239945  | -1.464219 |
|    | 2Au    | 0.000000                          | -1.596821 | -1.362326 | 2Au    | 0.000000                          | 2.272350  | -0.208684 | 2Pt    | 0.000000                          | -1.239945 | -1.464219 |
|    | 3Au    | 0.000000                          | 0.000000  | 2.524397  | 3Au    | 0.000000                          | -2.272350 | -0.208684 | 3Au    | 0.000000                          | 2.665993  | 0.855188  |
|    | 4Ni    | -1.236070                         | 0.000000  | 0.282502  | 4Pd    | -1.446402                         | 0.000000  | -0.902257 | 4Au    | 0.000000                          | 0.000000  | 1.180994  |
|    | 5Ni    | 1.236070                          | 0.000000  | 0.282502  | 5Pd    | 1.446402                          | 0.000000  | -0.902257 | 5Au    | 0.000000                          | -2.665993 | 0.855188  |
| 5b | 1Au    | 0.000000                          | 0.000000  | 2.083413  | 1Pd    | 0.204452                          | -0.237114 | 1.452609  | 1Pt    | -0.000032                         | -0.046921 | 1.354886  |
|    | 2Au    | 0.000000                          | 2.211683  | -0.960111 | 2Pd    | 0.204452                          | -0.237114 | -1.452609 | 2Pt    | -0.000032                         | -0.046921 | -1.354886 |
|    | 3Au    | 0.000000                          | -2.211683 | -0.960111 | 3Au    | -2.131947                         | 0.060925  | 0.000000  | 3Au    | 2.138880                          | -1.095914 | 0.000000  |
|    | 4Ni    | 1.125057                          | 0.000000  | -0.230215 | 4Au    | 1.689398                          | -1.901327 | 0.000000  | 4Au    | -0.000032                         | 2.284682  | 0.000000  |
|    | 5Ni    | -1.125057                         | 0.000000  | -0.230215 | 5Au    | 0.204452                          | 2.116534  | 0.000000  | 5Au    | -2.138785                         | -1.096114 | 0.000000  |
| 5c | 1Au    | 0.000000                          | 0.000000  | 0.618378  | 1Pd    | 0.000000                          | 1.246249  | -1.757657 | 1Pt    | 1.553602                          | 0.000713  | 0.000000  |
|    | 2Au    | 0.000000                          | 2.695221  | 0.314512  | 2Pd    | 0.000000                          | -1.246249 | -1.757657 | 2Pt    | -1.553603                         | 0.000713  | 0.000000  |
|    | 3Au    | 0.000000                          | -2.695221 | 0.314512  | 3Au    | 0.000000                          | 2.675153  | 0.612390  | 3Au    | 0.000000                          | -1.089484 | 1.885323  |
|    | 4Ni    | 0.000000                          | 1.126026  | -1.759726 | 4Au    | 0.000000                          | -2.675153 | 0.612390  | 4Au    | 0.000000                          | -1.089484 | -1.885323 |
|    | 5Ni    | 0.000000                          | -1.126026 | -1.759726 | 5Au    | 0.000000                          | 0.000000  | 0.822111  | 5Au    | 0.000000                          | 2.177560  | 0.000000  |

Supplementary Material (ESI) for PCCP  
This journal is © the Owner Societies 2011

|    |     |           |           |           |     |           |           |           |     |           |           |           |
|----|-----|-----------|-----------|-----------|-----|-----------|-----------|-----------|-----|-----------|-----------|-----------|
| 6a | 1Au | 0.000000  | 0.000000  | 3.198167  | 1Au | 0.000000  | 0.000000  | -1.481222 | 1Au | 0.000000  | 0.000000  | 3.141825  |
|    | 2Au | 0.000000  | 0.000000  | -1.518163 | 2Au | 0.000000  | 2.672648  | -1.434244 | 2Pt | 0.000000  | 1.265578  | 0.824019  |
|    | 3Au | 0.000000  | 2.644925  | -1.172320 | 3Pd | 0.000000  | -1.451234 | 0.975229  | 3Pt | 0.000000  | -1.265578 | 0.824019  |
|    | 4Au | 0.000000  | -2.644925 | -1.172320 | 4Pd | 0.000000  | 1.451234  | 0.975229  | 4Au | 0.000000  | 2.653338  | -1.466883 |
|    | 5Ni | 0.000000  | 1.133741  | 0.937610  | 5Au | 0.000000  | 0.000000  | 3.214000  | 5Au | 0.000000  | -2.653338 | -1.466883 |
|    | 6Ni | 0.000000  | -1.133741 | 0.937610  | 6Au | 0.000000  | -2.672648 | -1.434244 | 6Au | 0.000000  | 0.000000  | -1.835235 |
| 6b | 1Au | 0.000000  | 2.568196  | -1.396297 | 1Au | 0.000000  | 2.703817  | -1.467238 | 1Pt | 0.017618  | 1.242278  | 0.000000  |
|    | 2Au | 0.000000  | -2.568196 | -1.396297 | 2Au | 0.000000  | -2.703817 | -1.467238 | 2Pt | -0.017618 | -1.242278 | 0.000000  |
|    | 3Au | 0.000000  | -1.406913 | 1.056441  | 3Au | 0.000000  | -1.488165 | 0.951315  | 3Au | 2.542003  | 2.078191  | 0.000000  |
|    | 4Au | 0.000000  | 1.406913  | 1.056441  | 4Au | 0.000000  | 1.488165  | 0.951315  | 4Au | 2.542003  | -0.690789 | 0.000000  |
|    | 5Ni | 0.000000  | 0.000000  | 3.188307  | 5Pd | 0.000000  | 0.000000  | 3.199157  | 5Au | -2.542003 | 0.690789  | 0.000000  |
|    | 6Ni | 0.000000  | 0.000000  | -1.270545 | 6Pd | 0.000000  | 0.000000  | -1.427076 | 6Au | -2.542003 | -2.078191 | 0.000000  |
| 6c | 1Au | 0.000000  | 1.503864  | 0.378062  | 1Au | 2.540167  | 0.331524  | 0.000000  | 1Au | 0.000000  | 0.000000  | 3.121753  |
|    | 2Au | 0.000000  | -1.503864 | 0.378062  | 2Au | -0.082984 | 1.352658  | 0.000000  | 2Au | 0.000000  | 1.450521  | 0.838635  |
|    | 3Au | 0.000000  | 0.000000  | 2.658150  | 3Au | 0.082984  | -1.352658 | 0.000000  | 3Au | 0.000000  | -1.450521 | 0.838635  |
|    | 4Au | 0.000000  | 0.000000  | -2.054684 | 4Au | -2.540167 | -0.331524 | 0.000000  | 4Pt | 0.000000  | -2.667015 | -1.545438 |
|    | 5Ni | 0.000000  | 2.567463  | -1.917994 | 5Pd | -2.540167 | 2.337323  | 0.000000  | 5Pt | 0.000000  | 2.667015  | -1.545438 |
|    | 6Ni | 0.000000  | -2.567463 | -1.917994 | 6Pd | 2.540167  | -2.337323 | 0.000000  | 6Au | 0.000000  | 0.000000  | -1.747271 |
| 6d | 1Au | 1.125487  | -3.334378 | 0.000000  | 1Au | 0.000000  | 0.000000  | -1.915572 | 1Pt | 0.000000  | 0.000000  | 2.690495  |
|    | 2Au | -1.310214 | -1.697060 | 0.000000  | 2Au | 0.000000  | 0.000000  | 2.890818  | 2Pt | 0.000000  | 0.000000  | -0.822852 |
|    | 3Au | 1.310214  | 1.697060  | 0.000000  | 3Au | 0.000000  | 1.448540  | 0.581094  | 3Au | 0.000000  | 1.900674  | 0.921442  |
|    | 4Au | -1.125487 | 3.334378  | 0.000000  | 4Au | 0.000000  | -1.448540 | 0.581094  | 4Au | 0.000000  | -1.900674 | 0.921442  |
|    | 5Ni | -1.125487 | 0.821444  | 0.000000  | 5Pd | 0.000000  | 2.695233  | -1.835406 | 5Au | 0.000000  | -2.425526 | -1.843443 |
|    | 6Ni | 1.125487  | -0.821444 | 0.000000  | 6Pd | 0.000000  | -2.695233 | -1.835406 | 6Au | 0.000000  | 2.425526  | -1.843443 |
| 6e | 1Au | 0.000000  | 0.000000  | 0.000000  | 1Pd | 0.000000  | 0.000000  | 2.878713  | 1Au | 0.068064  | 1.377464  | 0.000000  |
|    | 2Au | 0.000000  | 0.000000  | 4.687155  | 2Pd | 0.000000  | 0.000000  | -0.693100 | 2Au | -0.068064 | -1.377464 | 0.000000  |
|    | 3Au | 2.747242  | 0.000000  | 3.724507  | 3Au | 0.000000  | 1.872653  | 1.062825  | 3Au | -2.613072 | 0.642901  | 0.000000  |
|    | 4Au | 2.747412  | -0.000221 | 0.962537  | 4Au | 0.000000  | -1.872653 | 1.062825  | 4Au | 2.613072  | -0.642901 | 0.000000  |
|    | 5Ni | 0.856206  | -1.019892 | 2.343556  | 5Au | 0.000000  | 2.440823  | -1.699142 | 5Pt | 2.613072  | 1.947538  | 0.000000  |
|    | 6Ni | -0.186671 | 0.895117  | 2.343577  | 6Au | 0.000000  | -2.440823 | -1.699142 | 6Pt | -2.613072 | -1.947538 | 0.000000  |
| 7a | 1Au | 2.484104  | -0.368092 | 0.000000  | 1Au | 0.397793  | 2.471557  | -0.000190 | 1Au | -0.185585 | 0.000000  | -0.132806 |
|    | 2Au | 2.280321  | 2.431421  | 0.000000  | 2Au | 2.473270  | 0.385501  | 0.000181  | 2Au | -0.185585 | 0.000000  | 2.828698  |
|    | 3Au | -2.601489 | 1.540981  | 0.000000  | 3Au | 1.131436  | -2.233094 | -0.000125 | 3Au | 2.632780  | 0.000000  | 3.747779  |
|    | 4Au | 0.000000  | 0.842188  | 0.000000  | 4Au | -1.774709 | -1.765802 | -0.000017 | 4Au | 4.378322  | 0.000000  | 1.347946  |
|    | 5Au | -1.602640 | -3.449606 | 0.000000  | 5Au | -2.227745 | 1.141871  | 0.000071  | 5Au | 2.632780  | 0.000000  | -1.051887 |
|    | 6Ni | -1.980191 | -0.933709 | 0.000000  | 6Pd | -0.000108 | -0.000022 | 1.290870  | 6Pt | 1.857154  | 1.274118  | 1.347946  |
|    | 7Ni | 0.399359  | -1.878950 | 0.000000  | 7Pd | 0.000028  | -0.000032 | -1.290733 | 7Pt | 1.857154  | -1.274118 | 1.347946  |
| 7b | 1Au | -0.092630 | 0.000000  | -0.067323 | 1Au | 0.000000  | 2.342864  | 1.409907  | 1Au | 2.594358  | 0.306126  | 0.000000  |

Supplementary Material (ESI) for PCCP  
This journal is © the Owner Societies 2011

|    |     |           |           |           |     |           |           |           |     |           |           |           |
|----|-----|-----------|-----------|-----------|-----|-----------|-----------|-----------|-----|-----------|-----------|-----------|
|    | 2Au | -0.092630 | 0.000000  | 2.787323  | 2Au | 0.000000  | 2.342864  | -1.409907 | 2Au | 2.127319  | 3.055558  | 0.000000  |
|    | 3Au | 2.622327  | 0.000000  | 3.669481  | 3Au | 0.000000  | -2.342864 | -1.409907 | 3Au | -2.696679 | 1.508417  | 0.000000  |
|    | 4Au | 4.299846  | 0.000000  | 1.360000  | 4Au | 0.000000  | -2.342864 | 1.409907  | 4Au | 0.000000  | 1.329295  | 0.000000  |
|    | 5Au | 2.622327  | 0.000000  | -0.949481 | 5Au | 0.000000  | 0.000000  | 0.000000  | 5Au | -1.079117 | -3.611694 | 0.000000  |
|    | 6Ni | 1.871957  | 1.135626  | 1.360000  | 6Pd | 0.000000  | 0.000000  | -2.898738 | 6Pt | -1.694597 | -0.984981 | 0.000000  |
|    | 7Ni | 1.871957  | -1.135626 | 1.360000  | 7Pd | 0.000000  | 0.000000  | 2.898738  | 7Pt | 0.736589  | -1.635898 | 0.000000  |
|    | 1Au | 1.577685  | -1.204058 | 0.000000  | 1Au | -1.798199 | -1.134939 | 0.000000  | 1Au | 0.000000  | 1.362359  | -1.915652 |
|    | 2Au | -1.186083 | -1.740266 | 0.000000  | 2Au | 1.051575  | -1.609467 | 0.000000  | 2Au | 0.000000  | -1.362359 | -1.915652 |
|    | 3Au | -2.668256 | 0.578865  | 0.000000  | 3Au | 2.790376  | 0.531063  | 0.000000  | 3Au | 0.000000  | 0.000000  | 3.173501  |
| 7c | 4Au | 2.704372  | 1.282996  | 0.000000  | 4Au | -2.694771 | 1.443921  | 0.000000  | 4Au | 0.000000  | 3.682402  | -0.478232 |
|    | 5Au | 0.000000  | 1.264179  | 0.000000  | 5Au | 0.000000  | 1.095156  | 0.000000  | 5Au | 0.000000  | -3.682402 | -0.478232 |
|    | 6Ni | -1.850113 | 3.047295  | 0.000000  | 6Pd | 1.817503  | 3.065091  | 0.000000  | 6Pt | 0.000000  | 1.258193  | 0.817482  |
|    | 7Ni | 0.643335  | -3.559994 | 0.000000  | 7Pd | -0.699448 | -3.624502 | 0.000000  | 7Pt | 0.000000  | -1.258193 | 0.817482  |
|    | 1Au | 0.072798  | 0.000000  | -0.155096 | 1Au | 2.609749  | 0.053459  | 0.000000  | 1Au | -1.885474 | -0.946402 | 0.000000  |
|    | 2Au | 0.072798  | 0.000000  | 2.929707  | 2Au | 2.077399  | 2.814520  | 0.000000  | 2Au | 0.926868  | -1.721586 | 0.000000  |
|    | 3Au | 4.732970  | 0.000000  | 2.929707  | 3Au | -2.609812 | 1.545311  | 0.000000  | 3Au | 2.686367  | 0.343264  | 0.000000  |
| 7d | 4Au | 4.732970  | 0.000000  | -0.155096 | 4Au | 0.000000  | 0.953330  | 0.000000  | 4Au | -2.686471 | 1.623233  | 0.000000  |
|    | 5Au | 2.402884  | 0.000000  | 1.387306  | 5Au | -1.296240 | -3.644898 | 0.000000  | 5Au | 0.000000  | 1.202397  | 0.000000  |
|    | 6Ni | 2.402884  | 0.000000  | 4.013296  | 6Pd | -2.046803 | -1.084827 | 0.000000  | 6Pt | -1.082441 | -3.511389 | 0.000000  |
|    | 7Ni | 2.402884  | 0.000000  | -1.238685 | 7Pd | 0.705355  | -1.872044 | 0.000000  | 7Pt | 2.053442  | 3.004061  | 0.000000  |
|    | 1Au | 0.000000  | -1.346207 | -1.695101 | 1Au | 0.000000  | 1.355415  | -1.776824 | 1Au | 0.000000  | 2.432235  | 1.487901  |
|    | 2Au | 0.000000  | 1.346207  | -1.695101 | 2Au | 0.000000  | -1.355415 | -1.776824 | 2Au | 0.000000  | 2.432235  | -1.487901 |
|    | 3Au | 0.000000  | 0.000000  | 3.062359  | 3Au | 0.000000  | 0.000000  | 3.315030  | 3Au | 0.000000  | -2.432235 | -1.487901 |
| 7e | 4Au | 0.000000  | -3.547481 | -0.131170 | 4Au | 0.000000  | 3.697378  | -0.437201 | 4Au | 0.000000  | -2.432235 | 1.487901  |
|    | 5Au | 0.000000  | 3.547481  | -0.131170 | 5Au | 0.000000  | -3.697378 | -0.437201 | 5Au | 0.000000  | 0.000000  | 0.000000  |
|    | 6Ni | 0.000000  | -1.120674 | 0.832580  | 6Pd | 0.000000  | -1.261619 | 0.955747  | 6Pt | 0.000000  | 0.000000  | 2.721737  |
|    | 7Ni | 0.000000  | 1.120674  | 0.832580  | 7Pd | 0.000000  | 1.261619  | 0.955747  | 7Pt | 0.000000  | 0.000000  | -2.721737 |
|    | 1Au | 0.000000  | 2.190475  | 2.710022  | 1Au | 0.000891  | -0.005710 | -0.003818 | 1Au | -2.727875 | 2.224728  | 0.000011  |
|    | 2Au | 0.000000  | -2.190475 | 2.710022  | 2Au | -0.001573 | -0.002517 | 2.785817  | 2Au | 0.000000  | 2.499167  | 0.000000  |
|    | 3Au | 0.000000  | -2.190475 | -2.710022 | 3Au | 2.481578  | 0.016291  | 4.057452  | 3Au | 2.727875  | 2.224728  | -0.000011 |
| 8a | 4Au | 0.000000  | 2.224654  | 0.000000  | 4Au | 4.393043  | 1.074165  | 2.368922  | 4Au | 2.727875  | -2.224728 | 0.000011  |
|    | 5Au | 0.000000  | 2.190475  | -2.710022 | 5Au | 2.378554  | 1.033336  | -0.951894 | 5Au | 0.000000  | -2.499167 | 0.000000  |
|    | 6Au | 0.000000  | -2.224654 | 0.000000  | 6Au | 3.884077  | 2.964731  | 0.383753  | 6Au | -2.727875 | -2.224728 | -0.000011 |
|    | 7Ni | 0.000000  | 0.000000  | -1.376088 | 7Pd | 1.697864  | 1.884924  | 1.725731  | 7Pt | -1.306997 | 0.000000  | 0.000000  |
|    | 8Ni | 0.000000  | 0.000000  | 1.376088  | 8Pd | 2.454054  | -0.672688 | 1.292316  | 8Pt | 1.306997  | 0.000000  | 0.000000  |
| 8b | 1Au | 0.000000  | 1.359823  | -2.760317 | 1Au | 0.000000  | 2.709136  | 2.259514  | 1Au | 2.445036  | -2.691033 | 0.000000  |
|    | 2Au | 0.000000  | 0.000000  | -0.329378 | 2Au | 0.000000  | 0.000000  | 2.517984  | 2Au | 2.351307  | -0.009011 | 0.000000  |
|    | 3Au | 0.000000  | -1.359823 | -2.760317 | 3Au | 0.000000  | -2.709136 | 2.259514  | 3Au | 2.407420  | 2.676708  | 0.000000  |
|    | 4Au | 0.000000  | 0.000000  | 4.365754  | 4Au | 0.000000  | -2.709136 | -2.259514 | 4Au | -2.383968 | 0.086689  | 0.000000  |

Supplementary Material (ESI) for PCCP  
 This journal is © the Owner Societies 2011

|    |     |           |           |           |     |           |           |           |     |           |           |           |
|----|-----|-----------|-----------|-----------|-----|-----------|-----------|-----------|-----|-----------|-----------|-----------|
|    | 5Ni | 0.000000  | -1.135705 | 2.099300  | 5Au | 0.000000  | 0.000000  | -2.517984 | 5Au | -2.609115 | -2.603470 | 0.000000  |
|    | 6Ni | 0.000000  | 1.135705  | 2.099300  | 6Au | 0.000000  | 2.709136  | -2.259514 | 6Pt | -2.171322 | 2.721942  | 0.000000  |
|    | 7Au | 0.000000  | -2.698958 | -0.001926 | 7Pd | 0.000000  | 1.302794  | 0.000000  | 7Pt | 0.000000  | 1.516488  | 0.000000  |
|    | 8Au | 0.000000  | 2.698958  | -0.001926 | 8Pd | 0.000000  | -1.302794 | 0.000000  | 8Au | -0.066844 | -1.644661 | 0.000000  |
|    | 1Au | 0.000000  | 2.654968  | 2.133713  | 1Au | 0.000000  | 0.000000  | -0.984264 | 1Au | 1.444990  | 0.935748  | 0.000000  |
|    | 2Au | 0.000000  | 0.000000  | 2.362635  | 2Au | 0.000000  | 0.000000  | 3.702564  | 2Au | -3.507743 | 0.201177  | 0.000000  |
|    | 3Au | 0.000000  | -2.654968 | 2.133713  | 3Au | 0.000000  | 2.846938  | -0.902925 | 3Au | -1.227409 | 0.354893  | 1.449374  |
| 8c | 4Au | 0.000000  | -2.654968 | -2.133713 | 4Au | 0.000000  | -2.846938 | -0.902925 | 4Au | -1.227409 | 0.354893  | -1.449374 |
|    | 5Au | 0.000000  | 0.000000  | -2.362635 | 5Au | -0.009240 | 1.491757  | 1.445856  | 5Au | 1.136586  | -1.638490 | 1.545296  |
|    | 6Au | 0.000000  | 2.654968  | -2.133713 | 6Au | 0.009240  | -1.491757 | 1.445856  | 6Au | 1.136586  | -1.638490 | -1.545296 |
|    | 7Ni | -0.000005 | 1.183285  | 0.000000  | 7Pd | -0.108614 | 1.497735  | -3.266617 | 7Pt | 1.136586  | 0.724302  | 2.659580  |
|    | 8Ni | 0.000005  | -1.183285 | 0.000000  | 8Pd | 0.108614  | -1.497735 | -3.266617 | 8Pt | 1.136586  | 0.724302  | -2.659580 |
|    | 1Au | 0.000000  | 0.000000  | -0.730257 | 1Au | 0.000000  | 0.000000  | -0.629637 | 1Au | 0.167202  | 3.143892  | 1.363539  |
|    | 2Au | 0.000000  | 0.000000  | 4.042515  | 2Au | 0.000000  | 0.000000  | 4.013583  | 2Au | 0.042425  | 0.738690  | 0.000000  |
|    | 3Au | 0.000000  | 1.419876  | 1.660858  | 3Au | 0.000000  | 1.475748  | 1.696083  | 3Au | 0.167202  | 3.143892  | -1.363539 |
| 8d | 4Au | 0.000000  | -1.419876 | 1.660858  | 4Au | 0.000000  | -1.475748 | 1.696083  | 4Au | -0.079445 | -4.191834 | 0.000000  |
|    | 5Au | 0.000000  | 1.447587  | -3.075738 | 5Au | 0.000000  | 1.387309  | -3.020542 | 5Au | -0.074820 | 0.414918  | -2.719340 |
|    | 6Au | 0.000000  | -1.447587 | -3.075738 | 6Au | 0.000000  | -1.387309 | -3.020542 | 6Au | -0.074820 | 0.414918  | 2.719340  |
|    | 7Ni | 0.000000  | -2.608202 | -0.680666 | 7Pd | 0.000000  | 2.861971  | -0.631166 | 7Pt | -0.074820 | -1.855729 | 1.256599  |
|    | 8Ni | 0.000000  | 2.608202  | -0.680666 | 8Pd | 0.000000  | -2.861971 | -0.631166 | 8Pt | -0.074820 | -1.855729 | -1.256599 |
|    | 1Au | 0.000000  | 2.395852  | 1.227934  | 1Au | -0.000059 | 2.952340  | 1.350024  | 1Au | 0.000000  | 0.000000  | -0.493137 |
|    | 2Au | 0.000000  | 1.702062  | -1.567162 | 2Au | 0.000004  | 0.485422  | 0.000000  | 2Au | 0.000000  | 0.000000  | 4.030787  |
|    | 3Au | 1.474029  | -0.851031 | -1.567162 | 3Au | -0.000059 | 2.952340  | -1.350024 | 3Au | 0.000000  | 2.785055  | -0.694064 |
| 8e | 4Au | 2.074869  | -1.197926 | 1.227934  | 4Au | 0.000028  | -4.390688 | 0.000000  | 4Au | 0.000000  | -2.785055 | -0.694064 |
|    | 5Au | -2.074869 | -1.197926 | 1.227934  | 5Au | 0.000027  | 0.221477  | -2.705080 | 5Au | -0.104545 | 1.549877  | 1.788863  |
|    | 6Au | -1.474029 | -0.851031 | -1.567162 | 6Au | 0.000027  | 0.221477  | 2.705080  | 6Au | 0.104545  | -1.549877 | 1.788863  |
|    | 7Ni | 0.000000  | 0.000000  | 2.500462  | 7Pd | 0.000027  | -2.097250 | 1.292790  | 7Pt | -0.594999 | 1.144393  | -2.900337 |
|    | 8Ni | 0.000000  | 0.000000  | 0.370856  | 8Pd | 0.000027  | -2.097250 | -1.292790 | 8Pt | 0.594999  | -1.144393 | -2.900337 |
